# Supplementary material for: Consecutive unilateral recording of the two eyes affects dark-adapted ERG responses, when compared to simultaneous bilateral recording
Source: Springer Nature journal article supplement (doi:10.1007/s10633-018-9661-y), 2018-11-08
Supplement: MOESM5 [file 16262116]

**ONLINE RESOURCE 5**

Consecutive unilateral recording of the two eyes affects dark-adapted ERG responses, when compared to simultaneous bilateral recording after 38 minutes of dark adaptation.

*Documenta Ophthalmologica*

Maya Ross, Hen Honig, Raaya Ezra-Elia, Eyal Banin, Alexey Obolensky, Edward Averbukh, Alexander Rosov, Elisha Gootwine and Ron Ofri

Corresponding author:

Ron Ofri, Koret School of Veterinary Medicine, The Hebrew University of Jerusalem, Israel

e-mail: ron.ofri@mail.huji.ac.il

*Supplementary table 5*

Implicit times (msec, mean ± SE) of dark- and light-adapted responses in unilaterally recorded eyes and bilaterally recorded eyes after 38 minutes of dark adaptation. P-val < 0.017 was considered significant and marked in bold. In each row, values with different superscript letters are significantly different from each other.

|  | Unilateral | | Bilateral (38 mins) (n= 6) | p-val |
| --- | --- | --- | --- | --- |
| 1st eye (n=8) | 2nd eye (n=8) |
| **Dark-adapted responses** | | | |  |
| Scotopic a-wave IT | 31.9 ± 2.2 | 33.6 ± 1.4 | 35.2 ± 0.6 | 0.414 |
| Scotopic b-wave IT | 87.0 ± 2.4 | 88.6 ± 1.0 | 88.1 ± 0.9 | 0.799 |
| Std R&C a-wave IT | 16.2 ± 0.9 | 15.1 ± 0.5 | 14.8 ± 0.2 | 0.346 |
| Std R&C b-wave IT | 62.8 ± 2.6 a | 52.7 ± 4.9 ab | 43.8 ± 2.9 b | **0.009** |
| Hi int R&C a-wave IT | 16.3 ± 1.1 | 14.9 ± 0.6 | 15.2 ± 0.3 | 0.397 |
| Hi int R&C b-wave IT | 49.0 ± 4.7 | 46.4 ± 3.5 | 39.3 ± 0.7 | 0.220 |
| **Light-adapted responses** | | |  |  |
| Photopic 3cd a-wave IT | 13.0 ± 0.5 | 12.3 ± 0.3 | 12.4 ±0.3 | 0.355 |
| Photopic 3cd b-wave IT | 26.2 ± 0.6 | 25.4 ± 1.0 | 26.2 ± 0.3 | 0.668 |
| Photopic 10cd a-wave IT | 13.4 ± 0.1 | 12.3 ± 0.8 | 13.5 ± 0.2 | 0.220 |
| Photopic 10cd b-wave IT | 30.3 ± 0.5 | 29.0 ± 1.6 | 30.5 ± 0.2 | 0.570 |
